# Supplementary material
Source: PubMed Central journal article supplement (PMC5703311)
Supplement: pnas.1712887114.sapp.pdf [file pnas.1712887114.sapp.pdf]

1 **SUPPLEMENTAL METHODS AND INFORMATION**

2

3 **Host Based Lipid Inflammation Drives Pathogenesis in *Francisella* Infection**

4 Alison J. Scott<sup>1</sup>, Julia Maria Post<sup>2</sup>, Raissa Lerner<sup>2</sup>, Shane R. Ellis<sup>3</sup>, Joshua Lieberman<sup>4</sup>, Kari Ann  
5 Shirey<sup>5</sup>, Ron M.A. Heeren<sup>3</sup>, Laura Bindila<sup>2</sup>, Robert K. Ernst<sup>1\*</sup>

6

7 <sup>1</sup> Department of Microbial Pathogenesis, School of Dentistry, University of Maryland,

8 Baltimore, MD 21201, USA

9 <sup>2</sup> Laboratory for Eicosanoids and Endocannabinoids, Johannes Gutenberg University Mainz, DE

10 <sup>3</sup> M4I, The Maastricht MultiModal Molecular Imaging Institute, Maastricht University, 6229 ER,

11 Maastricht, NL

12 <sup>4</sup> Department of Pathology, University of Washington Medical Center, Seattle, WA 98118, USA

13 <sup>5</sup> Department of Microbiology & Immunology, School of Medicine, University of Maryland,

14 Baltimore, MD 21201, USA

15

16 Corresponding Author:

17 Robert K. Ernst

18 Department of Microbial Pathogenesis, School of Dentistry

19 University of Maryland, Baltimore

20 650 W. Baltimore St

21 Baltimore, MD 21201

22 [rkernst@umaryland.edu](mailto:rkernst@umaryland.edu)

23 1 410 706 3622

24

25

26 **SUPPLEMENTAL METHODS**

27 **METHODS**

28 ***Bacterial strains and growth conditions for infections***

29 *Francisella novicida* (*Fn*) strain U112 wildtype was grown in Tryptic Soy Broth (Sigma Aldrich,  
30 St. Louis, MO) containing 0.1% (w/v) L-cysteine (Sigma-Aldrich, St. Louis, MO) (TSBC). Agar  
31 plates were of the same composition with addition of 1.5% agar without antibiotic. Cultures were  
32 inoculated from frozen stocks onto TSBC agar plates and grown overnight at 37°C. A 5mL  
33 TSBC liquid culture was inoculated for expansion at 37°C, overnight. Three hours prior to  
34 infection a large volume subculture (1:37.5) was inoculated and grown for three hours. Bacteria  
35 were harvested by centrifugation and resuspended in sterile phosphate buffered saline (PBS)  
36 (Lonza, Walkersville, MD) for measurement of optical density. Infectious dose estimates were  
37 calculated for 300 CFU/dose (50uL), serial dilutions and final inoculum were suspended in  
38 sterile PBS. Final inoculum was enumerated (colony forming units, CFU) in duplicate 10 µL  
39 drops on agar plates. All cultures for infection were grown at 37°C with orbital shaking at  
40 225RPM. Infections with *Fn* ΔlpxD1 were performed according to the methods previously  
41 described by Li *et al.* (1) Briefly, inoculum was prepared as above with  $5.5 \times 10^6$  organisms per  
42 dose (SQ) in PBS confirmed by CFU plating. Lipid A phenotype of *Fn* ΔlpxD1 inoculum was  
43 verified at *m/z* 1609 according to the published rapid lipid A extraction method. (2)

44

45 ***Mouse infections and tissue collection***

46 Adult, female C57BL/6 mice were obtained from Jackson Laboratories. COX-2 knockout (*Ptgs2*<sup>-/-</sup>)  
47 mice (3) were a generous gift from Dr. Stefanie Vogel (University of Maryland School of  
48 Medicine). Mice were housed in aBSL2 microisolator caging with negative pressure flow. Food



49 and water were provided *ad libitum*. Infectious material was delivered subcutaneously (SQ)  
50 using a tuberculin syringe and animals were monitored twice daily for signs of  
51 morbidity/mortality as well as recording of clinical progression scores. Mice were euthanized by  
52 carbon dioxide narcosis and secondary thoracotomy; tissues were excised post-mortem for  
53 MALDI-MSI. Tissues were collected every twelve hours through the lethal time point at  
54 seventy-two hours post infection. All studies were performed under humane guidelines according  
55 to the Institutional Care and Use Committee of the University of Maryland, Baltimore, under an  
56 approved protocol. The following criteria were used to assign clinical scores: 0-shiny coat,  
57 active, responsive to handling and tightly grasp cage top; 1-slight lethargy, but still shiny coat,  
58 readily release hold of cage top on handling; 2-decreased responsiveness to handling, mild to  
59 moderate piloerection, general lethargy; 3-decreased activity, ruffled or scruffy coat, marked loss  
60 of grooming activity, hunched posture, rapid shallow breathing; 4-inactive and unresponsive,  
61 weak or ataxic; 5-deceased.

62

### 63 ***Tissue preparation for MSI and histology***

64 Tissues for two-dimensional (2D) MALDI-MSI were frozen at a controlled rate using a foil float  
65 in a liquid nitrogen pool. MALDI-MSI tissues were sectioned at 10  $\mu\text{m}$  thickness (for 2D TOF  
66 experiments) and 13  $\mu\text{m}$  thickness (for FTMS and 3D reconstruction experiments) on a Leica  
67 cryomicrotome (Buffalo Grove, IL). Thin sections were moved to slides with brushes and heat  
68 mounted in place at 37°C. Tissues for three-dimensional (3D) MALDI-MSI were formalin fixed  
69 (10% neutral buffered formalin) for eighteen hours and switched to PBS. Fixed tissues were snap  
70 frozen prior to cryosectioning. Fixed sections were cut to 13  $\mu\text{m}$  thickness and heat mounted as  
71 above. Following MSI, sections were stripped of matrix in 70% ethanol and stained by

72 hematoxylin and eosin (H&E) as previously described. (4) Tissues for pathology were fixed for  
73 eighteen hours then embedded in paraffin. Thin formalin-fixed paraffin-embedded (FFPE)  
74 sections were cut and stained by the University of Maryland, Baltimore Medical School  
75 Histology Core. Digital scans of all H&E stained slides were captured on an Aperio Slide  
76 Scanner and visualized in ImageScope software (Aperio, Leica Microsystems, Buffalo Grove,  
77 IL).

### 79 *Histology of infected spleens*

80 A Resident Physician in Anatomic Pathology (Dr. Joshua Lieberman) analyzed fourteen blinded  
81 spleen scans from a SQ infection with *Fn*. Two spleens representing biological replicates at  
82 seven different time points (naïve, 12, 24, 36, 48, 60, 72) hours post infection (h.p.i.) were  
83 analyzed and reported prior to unblinding. Following routine formalin fixation and tissue  
84 processing, two 8 µm sections for each spleen were cut, stained by Hematoxylin & Eosin, and  
85 scanned to digital image files using Aperio Image Scope software. Digital slide images of spleen  
86 sections were evaluated for white pulp and red pulp architecture, as well as cell population and  
87 cytology; bacteria were noted when applicable. Presence of Gram-negative organisms in the *Fn*  
88 infected spleens was confirmed using the Brown and Brenn staining kit (American MasterTech,  
89 Lodi, CA).

### 91 *2D MALDI-TOF-MSI*

92 For MALDI-TOF-MSI, thin tissue sections mounted on ITO slides (above) were sprayed with  
93 matrix for imaging as follows: lipid A imaging – 12 mg/mL norharmane (NRM) in 2:1:0.5  
94 (v:v:v) chloroform:methanol:water (**Fig. 1**); phospholipid imaging – 10 mg/mL NRM in 1:2:0.5

95 (v:v:v) chloroform:methanol:water (**Fig. 2**). (4,5) In both cases, approximately 10 mL total  
96 volume was applied in an ImagePrep (Bruker, Billerica, MA) nebulization device. Lipid A  
97 images were captured in negative ion mode on an UltraFlex MALDI-TOF/TOF(Bruker,  
98 Billerica, MA) with 75  $\mu\text{m}$  rastering over a mass range of  $m/z$  600-1700. Phospholipid images  
99 were captured in negative ion mode at 75  $\mu\text{m}$  resolution over a mass range of  $m/z$  600-1500.  
100 Calibration to 50 ppm was performed on a peptide calibrant spotted on the slide in NRM matrix.  
101 All time course tissues were mounted on the same ITO slide and captured in arbitrary order to  
102 avoid collection order bias and effects from matrix sublimation during capture. SAPI  
103 fragmentation analysis was performed on-tissue by MALDI-TOF/TOF (UltraFlex) in negative  
104 ion mode. Images were captured and analyzed using flexImaging (Bruker, Billerica, MA).  
105 Images were normalized to total ion current (TIC) and visual display range was optimized (using  
106 a frequency vs. intensity histogram) for each mass feature shown. Both  $m/z$  1665 (lipid A) and  
107  $m/z$  885.6 (SAPI) images (**Figs. S14, S15; respectively**) are given as monocolour TIC normalized  
108 data (a), monocolour TIC normalized data showing region of interest (ROI) capture area outlines  
109 (b), monocolour unnormalized data (c), and as multicolour scale TIC normalized data (d) for  
110 maximum transparency of image preparation, analysis, and interpretation. Images (histology and  
111 MSI) were exported as .tiff files and cropped for presentation in GIMP (GNU Image  
112 Manipulation Program v2.8.10, [www.gimp.org](http://www.gimp.org)). Global enhancement of SAPI and lipid A  
113 images were applied (10% brightness optimization) uniformly in **Figs. 1 and 2** in post-analysis to  
114 ensure fidelity of print to the electronically displayed data, **Figs. S14, S15** are the underlying  
115 images, unmodified for reference.

116

117

118 **3D MALDI-TOF-MSI**

119 For 3D MALDI-TOF MSI reconstructions fixed tissues were sectioned and heat-mounted to ITO  
120 as above. Tissues were prepared for imaging using a SunChrom Sprayer Device (SunCollect,  
121 Napa, CA) using the same matrix solutions as above and deposition according to previously  
122 described methods by Scott *et al.* (4) Imaging was performed in negative ion mode at 20  $\mu\text{m}$   
123 rastering, 200 shots per raster position, on a Bruker RapiFlex (6) MALDI-TOF/TOF (Billerica,  
124 MA). Instrument was externally calibrated prior to each MSI acquisition using to red phosphorus  
125 clusters. Final 3D reconstruction was performed in SCiLS software (7) (SCiLS Lab v 2016a,  
126 Bremen, DE), composed of 16 serial sections of spleen cut from the central third of the tissue  
127 from infection at 48 h.p.i., an area roughly 0.75 cm x 0.75 cm. All images were imported into  
128 SCiLS and normalized to TIC for use in 3D image reconstruction. Video rendering of single ion  
129 channel volume views were performed in the same manner.

130

131 **2D MALDI-FTICR-MSI**

132 MALDI-TOF 2D MSI results were confirmed using MALDI-FTICR MSI using the same tissue  
133 preparation steps as above for MALDI-TOF, except that tissues were cut to 13  $\mu\text{m}$  thickness.  
134 Data was captured according to previously described conditions by Scott *et al.* (4) Briefly, a  
135 Bruker solariX 12T MALDI-FTICR (Billerica, MA) was calibrated to 1ppm using sodium  
136 trifluoroacetate clusters in negative ion mode, data was collected at 75  $\mu\text{m}$  rastering with 100  
137 shots per raster. Spectral data were processed for images in flexImaging (Bruker Daltonics,  
138 Billerica, MA), normalized to TIC.

139

140

141 ***Quantitation of eicosanoids and phospholipids using LCMS MRM methods***

142 Extraction and quantification of PLs and eicosanoids was carried out as previously described (8)  
143 from approximately 5mg portions each of spleen. Care was taken to ensure the extracted spleen  
144 portion was taken from the center of the tissues by first bisecting the frozen spleens and snapping  
145 a frozen portion away with a clean razor blade. All spleen portions were weighed and total  
146 protein quantitated (BCA assay) according to manufacturer's instructions (ThermoPierce) for  
147 normalization purposes prior to extraction. Lipid Maps (9) quantitative standards were spiked  
148 into extraction from a common master mix containing each lipid class to be analyzed.

149

150 ***Quantitative RT-PCR***

151 Total RNA was extracted from spleens according to previously described methods. Results are  
152 presented at log<sub>2</sub> fold changes in transcript abundance over naïve (mouse transcripts). Data was  
153 analyzed according to previously established methods. Primer pairs for the *Il1b*, *Tnfa*, *Pla2*, and  
154 *Ptgs2*, and *Hprt* gene products were established previously. (10) 16S (F-  
155 GTTACCCAAAGAATAAGCACCG, R-AAATTCCCCATTCCTCTACCG and dnaK (F-  
156 GGACAAACTCGTATGCCTCTAG, R-CACCTCCCATAGTCTCAATACC) primers for the  
157 corresponding *Fn* gene products were designed in using RealTime PCR Design Tool (IDT,  
158 Coralville, IA). Bacterial expression data were analyzed using the copy count method.  
159 Significance was evaluated using the Student's t-test, *p* values are given in legends.

160

161 ***Confirmation of lipid A structure in spleen***

162 Lipid A structure from total lipid extracts (performed according to Scott *et al*) (4) of infected  
163 mouse spleens was confirmed via tandem mass spectrometry. Briefly, the lipid extract was

164 mixed with 1:1 with norharman matrix solution (v:v) and 1  $\mu$ L deposited onto an ITO slide.  
165 MS/MS and MS<sup>3</sup> fragmentation data were acquired on an Orbitrap Elite (Thermo Fisher  
166 Scientific GmbH, Bremen, Germany) mass spectrometer coupled to an intermediate pressure  
167 (~7.5 torr) MALDI ion source (Spectrograph LLC, Kennewick, WA, USA ) MS/MS and MS<sup>3</sup>  
168 fragmentation data were collected using collision-induced dissociation (40, normalized energy,  
169 1.5 Da window) with ion trap detection. Standard MS2 and MS3 fragmentation patterns for *Fn*  
170 lipid A established by Shaffer *et al* (11) were readily identified. Further, we evaluated an  
171 alternative fragmentation pattern (**Fig. S4**, redrawn from Shaffer *et al*) to confidently assign the  
172 major lipid A structure in **Fig. 1b**. MALDI and trapping conditions were as follows: 1  $\mu$ L of total  
173 lipid extract was spotted on a MALDI target with 1  $\mu$ L norharmane in 2:1 chloroform:methanol  
174 (v:v).

175

176 **SUPPLEMENTARY INFORMATION**

177

178 Table S1: Lipid A fragmentation confirming host-adapted structure.

| <b>1665.2</b> →<br>MS2 Fragments ( <i>m/z</i> ) | <b>1665.2</b> → <b>1424.9</b> <sup>#</sup><br>MS3 Fragments ( <i>m/z</i> ) |
|-------------------------------------------------|----------------------------------------------------------------------------|
| 1504.2                                          | 1382.9                                                                     |
| 1424.9                                          | 1365.1                                                                     |
| 1408.9                                          | 1263.8                                                                     |
| 1364.8                                          | 1246.3                                                                     |
| 1248.0                                          | 1204.0                                                                     |
| 1203.8                                          | 1184.8                                                                     |
| 1124.7 <sup>*</sup>                             | 1168.8                                                                     |
| 1108.6                                          | 1124.9                                                                     |
| 947.7 <sup>*</sup>                              | 1108.8                                                                     |
| 921.6                                           | 1007.6                                                                     |
| 868.4 <sup>*</sup>                              | 963.8                                                                      |
| 707.3 <sup>*</sup>                              | 946.5                                                                      |
| 665.3                                           | 868.3                                                                      |
|                                                 | 707.4                                                                      |
|                                                 | 665.3                                                                      |

179

180 \*Identifying fragments ions of 1665.2 per Shaffer *et al.*

181 #Minor fragment ion of 1665.2 produced alternative identifying fragmentation pattern.

182

183

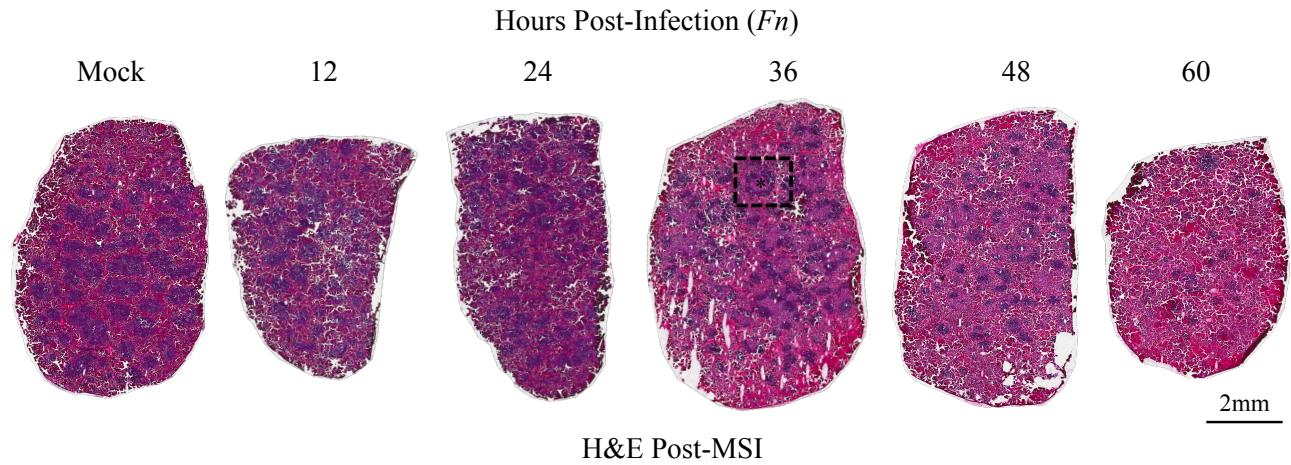

184  
185  
186  
187  
188  
189  
190

**Figure S1: Tissue references for spleen MSI data.** Tissue sections analyzed in **Fig 1a** stained by H&E for reference, black outlined box region references the location of an annotated white pulp nodule in serial sections analyzed in **Fig 2a**.



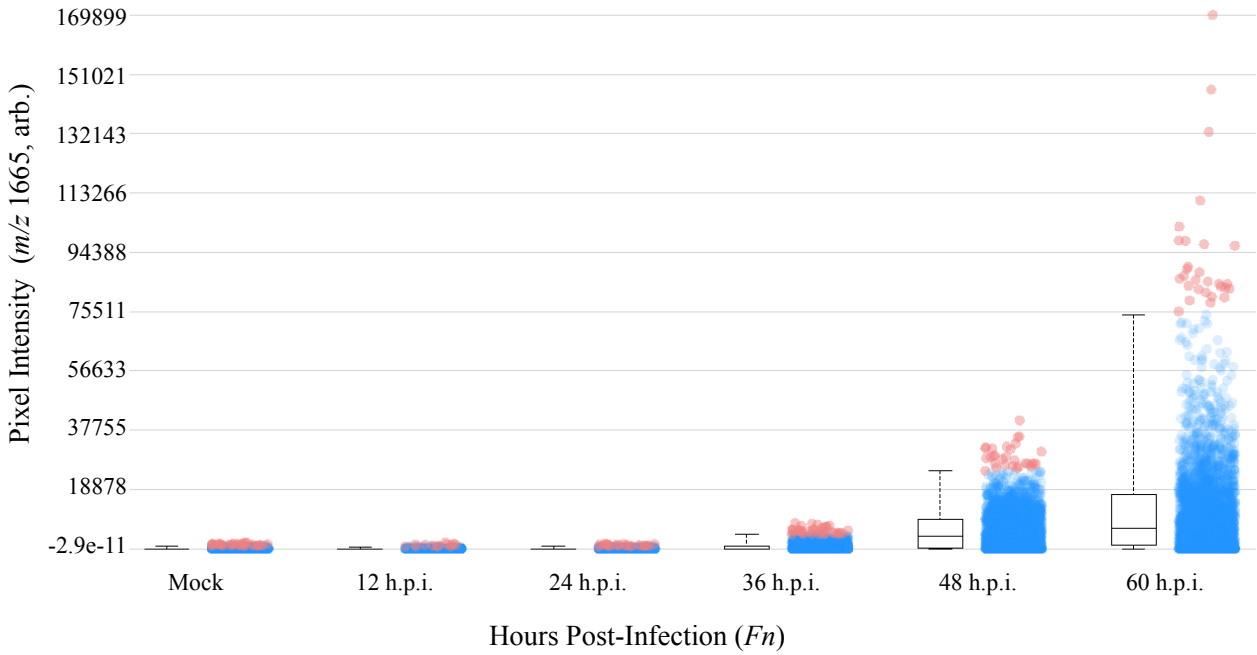

191  
 192  
 193  
 194  
 195  
 196  
 197  
 198

**Figure S2: Pixel intensities of *Fn* lipid A across infection timecourse.** Pixel intensity (arbitrary units, normalized, TIC) plotted for each timecourse condition from MALDI-FTICR validation studies of MALDI-TOF imaging data in **Fig. 1a**. Box and whisker plots given to the left representing a summation of the individual pixel intensities plotted on the right.

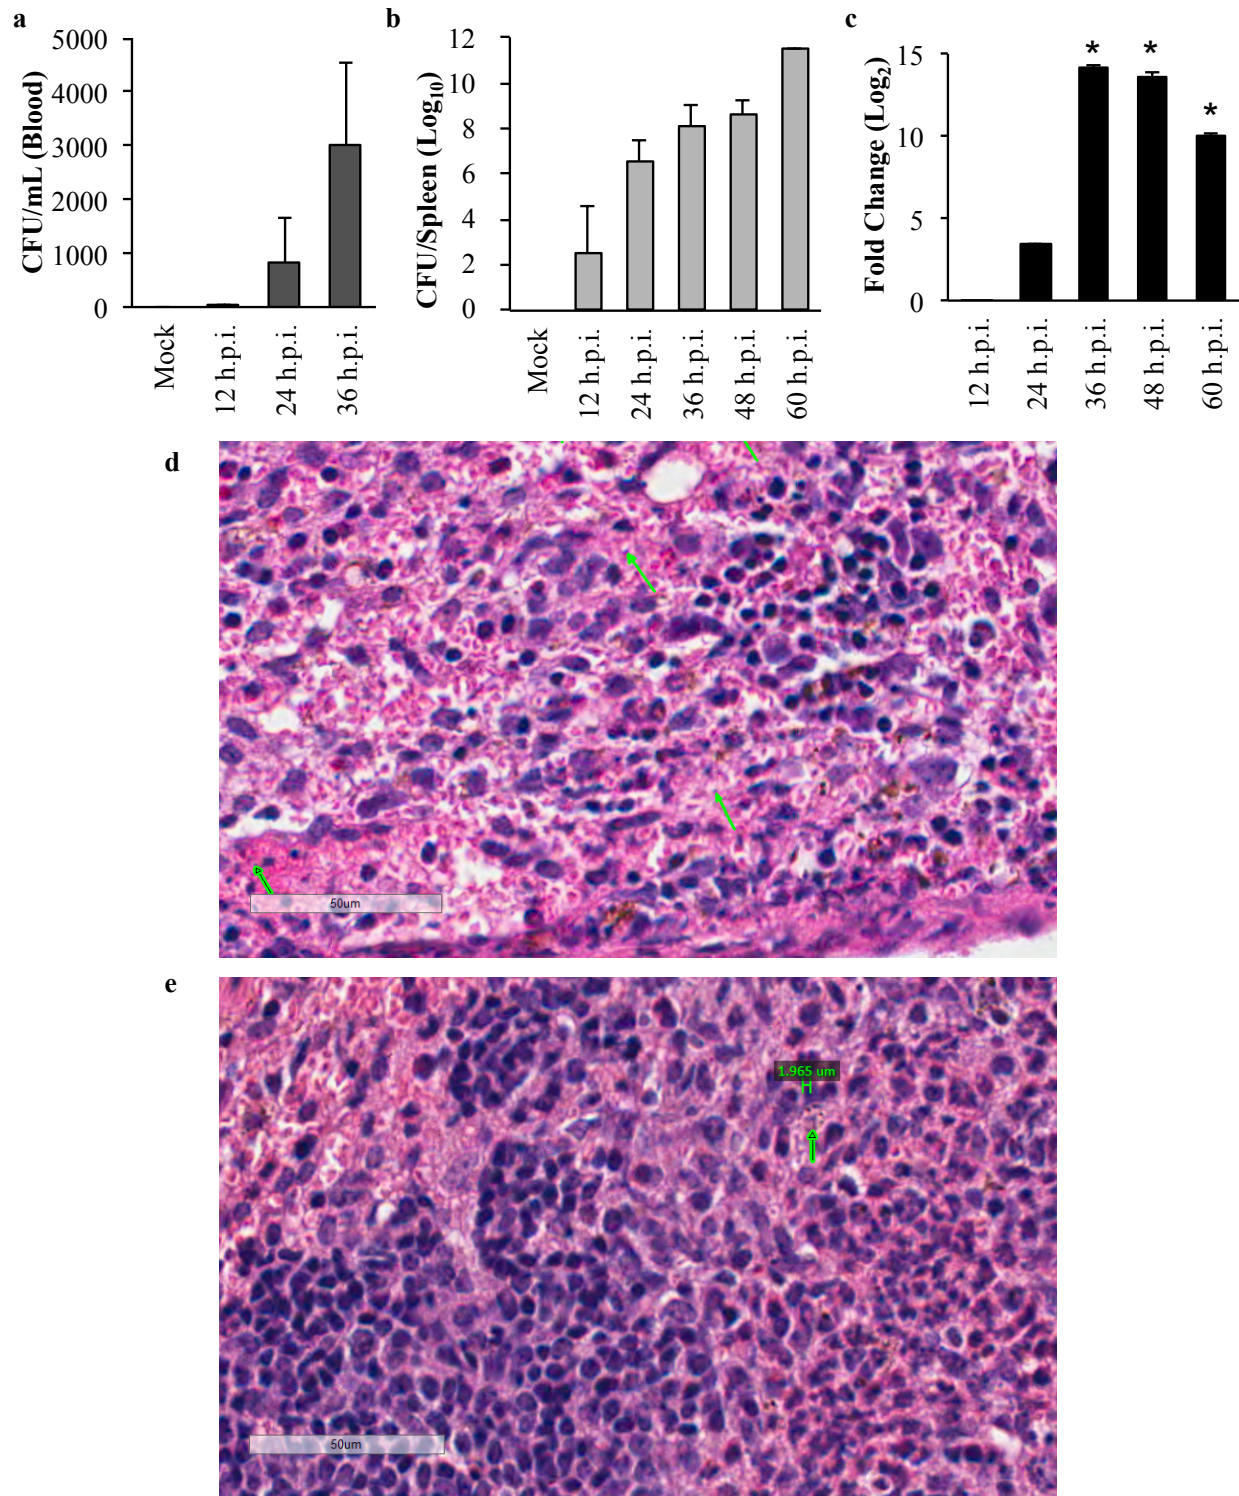

199  
 200 **Figure S3: Confirmation of bacterial burden in imaged tissues.** a) Bacterial dissemination  
 201 (*Fn*), cardiac blood, postmortem, colony forming units (CFU) enumerated on TSBC agar plates  
 202 from triplicate infections. b) Bacterial burden in spleens from a parallel experiment (363  
 203 CFU/dose, SQ). c) Confirmation of bacterial transcript in second half of bisected spleens from  
 204 MSI panel, *Fn dnaK* transcript normalized to murine *Hprt*. n=3. a,b. Error bars = SD. d)

205 Representative identification of bacteria (green arrows) within infected spleens at 36 h.p.i.,  
206 FFPE, H&E, 40x magnification, subcapsular red pulp. e) Measurement of *Fn* length in green at  
207 arrow tip, 1.965 $\mu$ m, intracellular, tissue same as c.

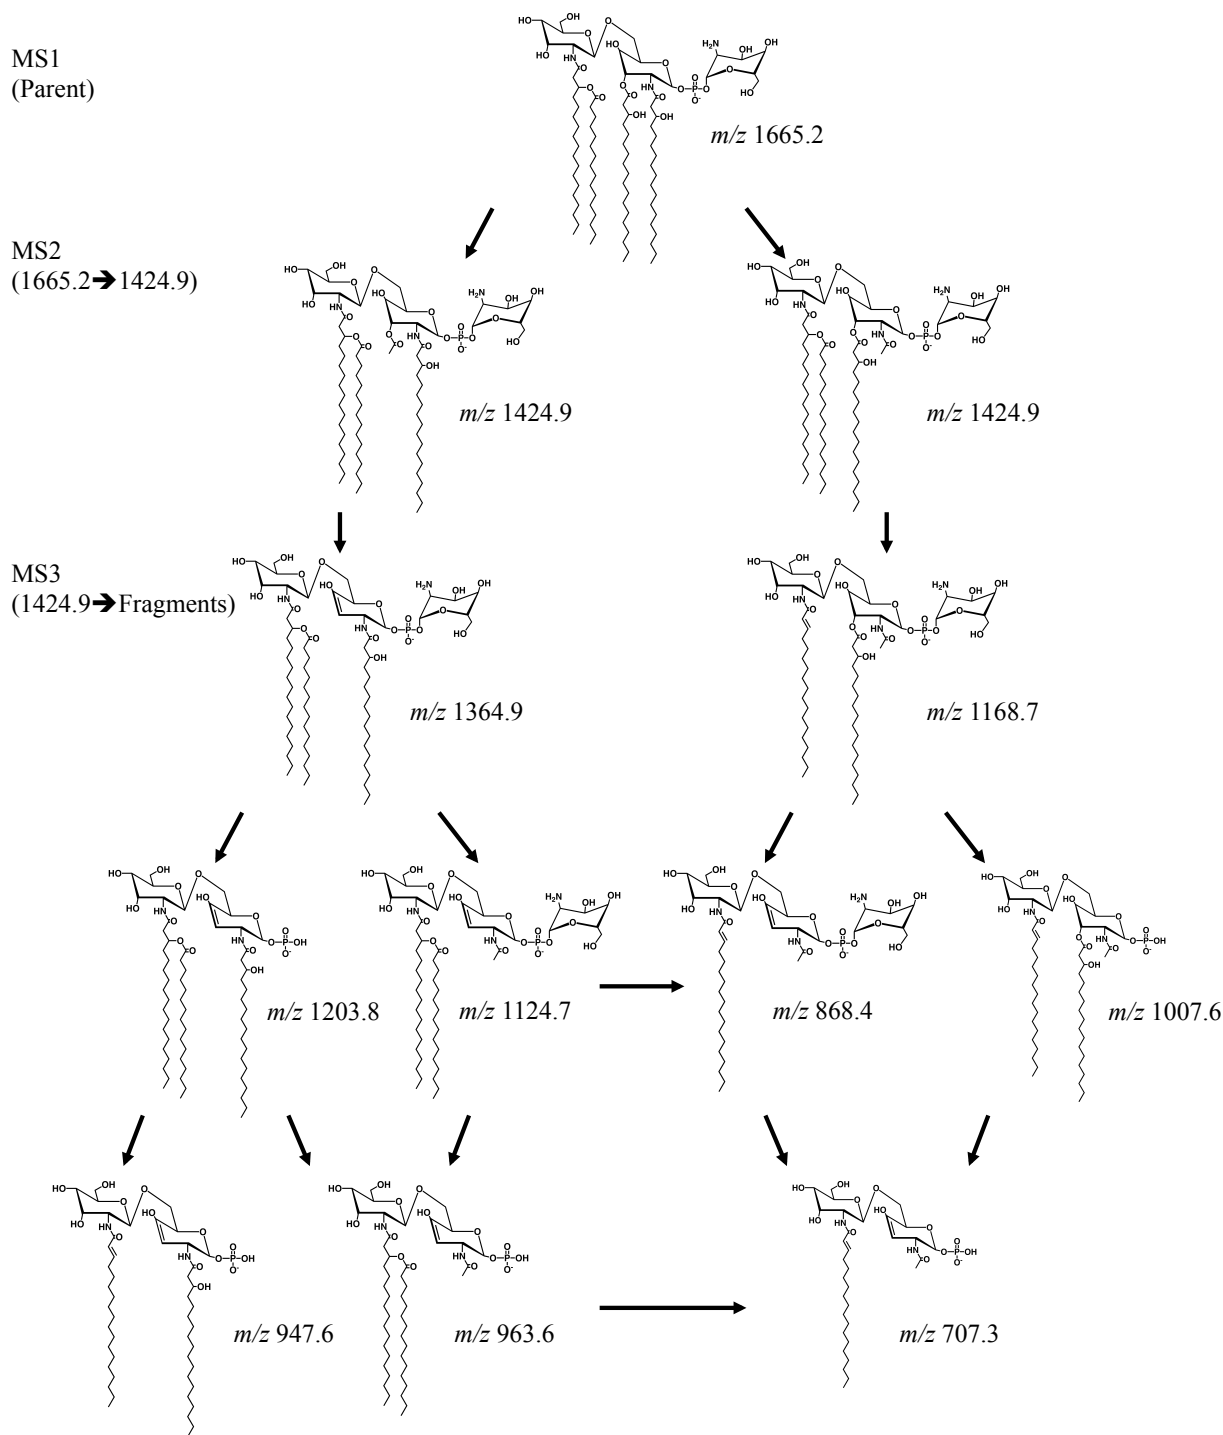

208  
209

210 **Figure S4: Alternative fragmentation pattern observed in *ex vivo* lipid A extracts**  
 211 **confirming assigned structure.** Redrawn with permission from Springer (License  
 212 4064251241606) from Shaffer *et al*<sup>10</sup>, fragments from Table S1.

213  
214

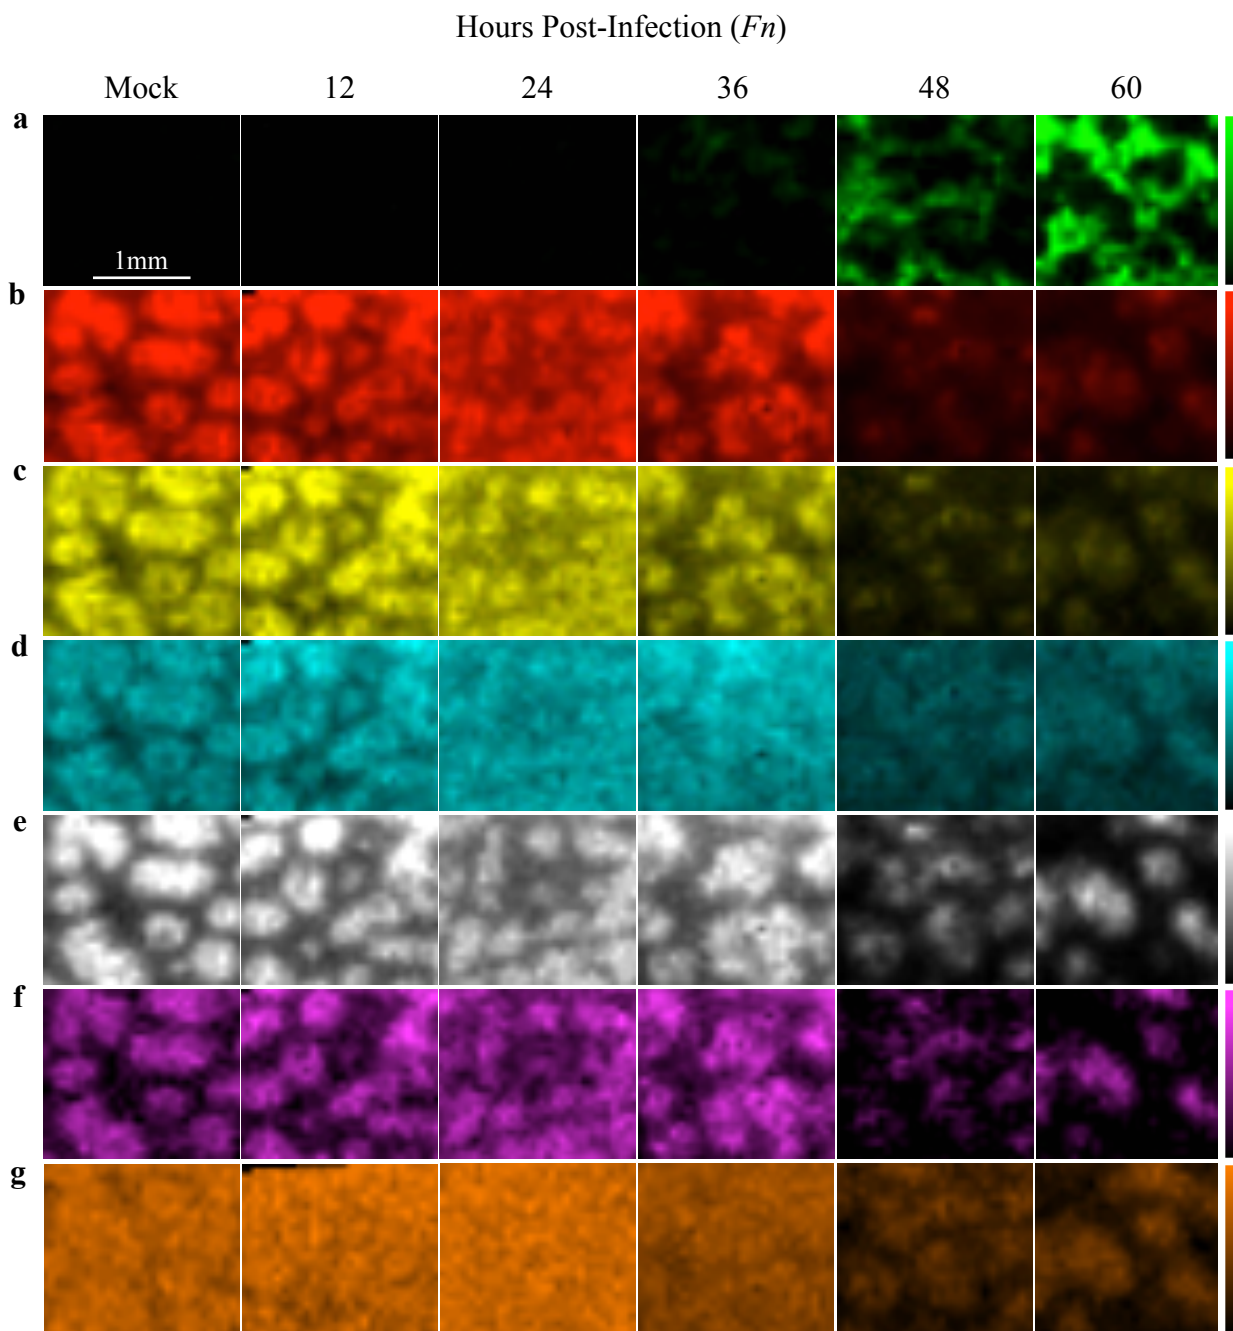

215  
216  
217  
218  
219  
220  
221  
222  
223  
224  
225

**Figure S5: MALDI-FTICR high mass accuracy confirmation of MALDI-TOF MSI data; differential distribution of lipid A and six phospholipids following infection with *Fn*.** Serial sections of tissues in **Figs. 1, 2**. a) Lipid A, green,  $m/z$  1665.2, scale 0-50 (arbitrary intensity). b) SAPI, red,  $m/z$  885.6, scale 0-1000. c) PI 36:4, yellow,  $m/z$  857.5, scale 0-90. d) PI 34:1, cyan,  $m/z$  835.5, scale 0-65. e) PE 38:4, white,  $m/z$  766.5, scale 0-130. f) unassigned identity, magenta,  $m/z$  763.5, scale 0-16, noted for unique white pulp nodule distribution. g) PA 38:4, orange,  $m/z$  723.5, scale 0-32. a-b) identity confirmed by  $MS^n$  fragmentation. b-e, g) pattern and identity confirmed by LCMS.

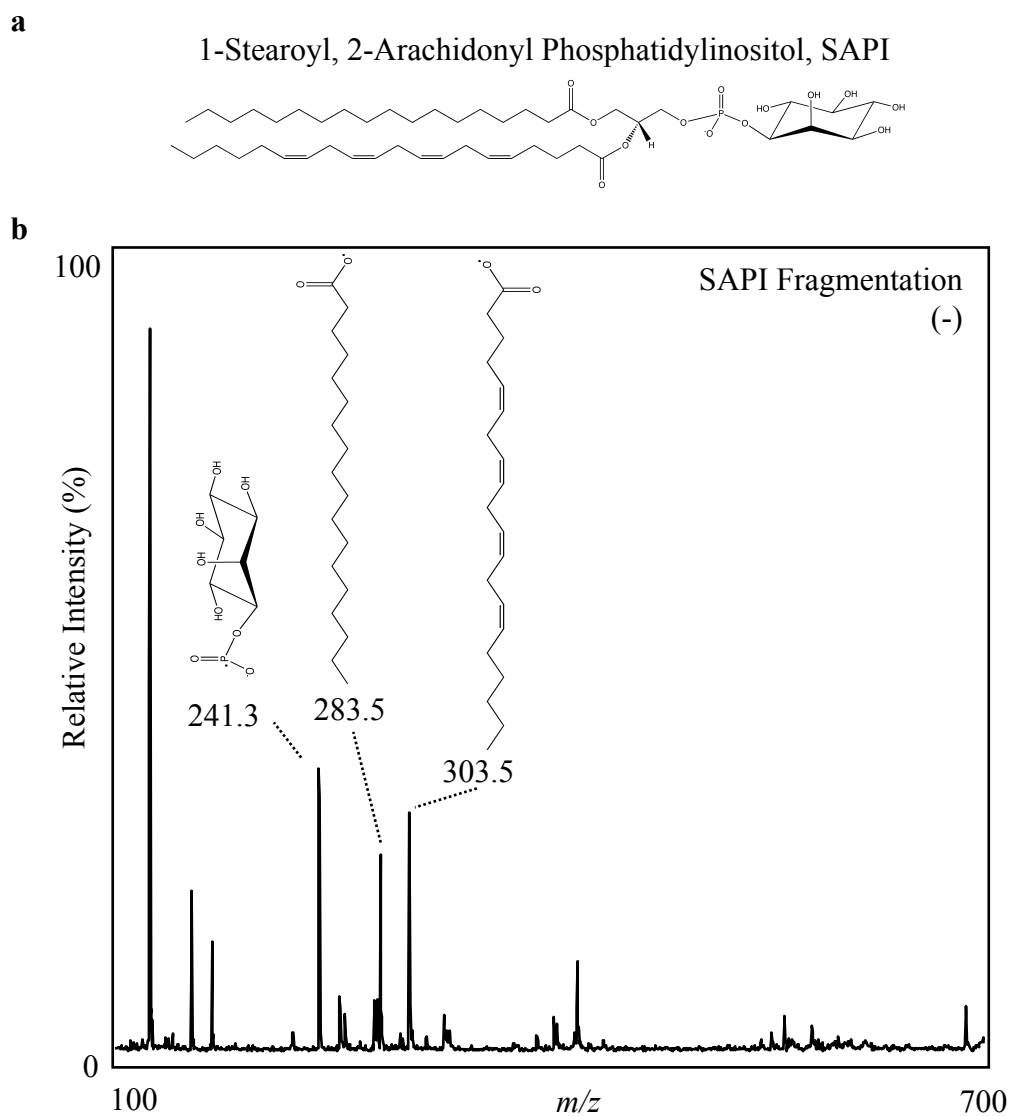

227  
228

229 **Figure S6: Confirmation of SAPI Identity by tandem MS.** a) Predominant structure of  $m/z$   
230 885.7, SAPI. b) Fragment ion spectrum of parent peak  $m/z$  885.7. Three characteristic fragments  
231 for SAPI detected at  $m/z$  241.3 (phosphoinositol headgroup), 283.5 (stearoyl fatty acid), and  
232 303.5 (arachidonyl fatty acid). Negative mode MALDI-MS/MS.

233



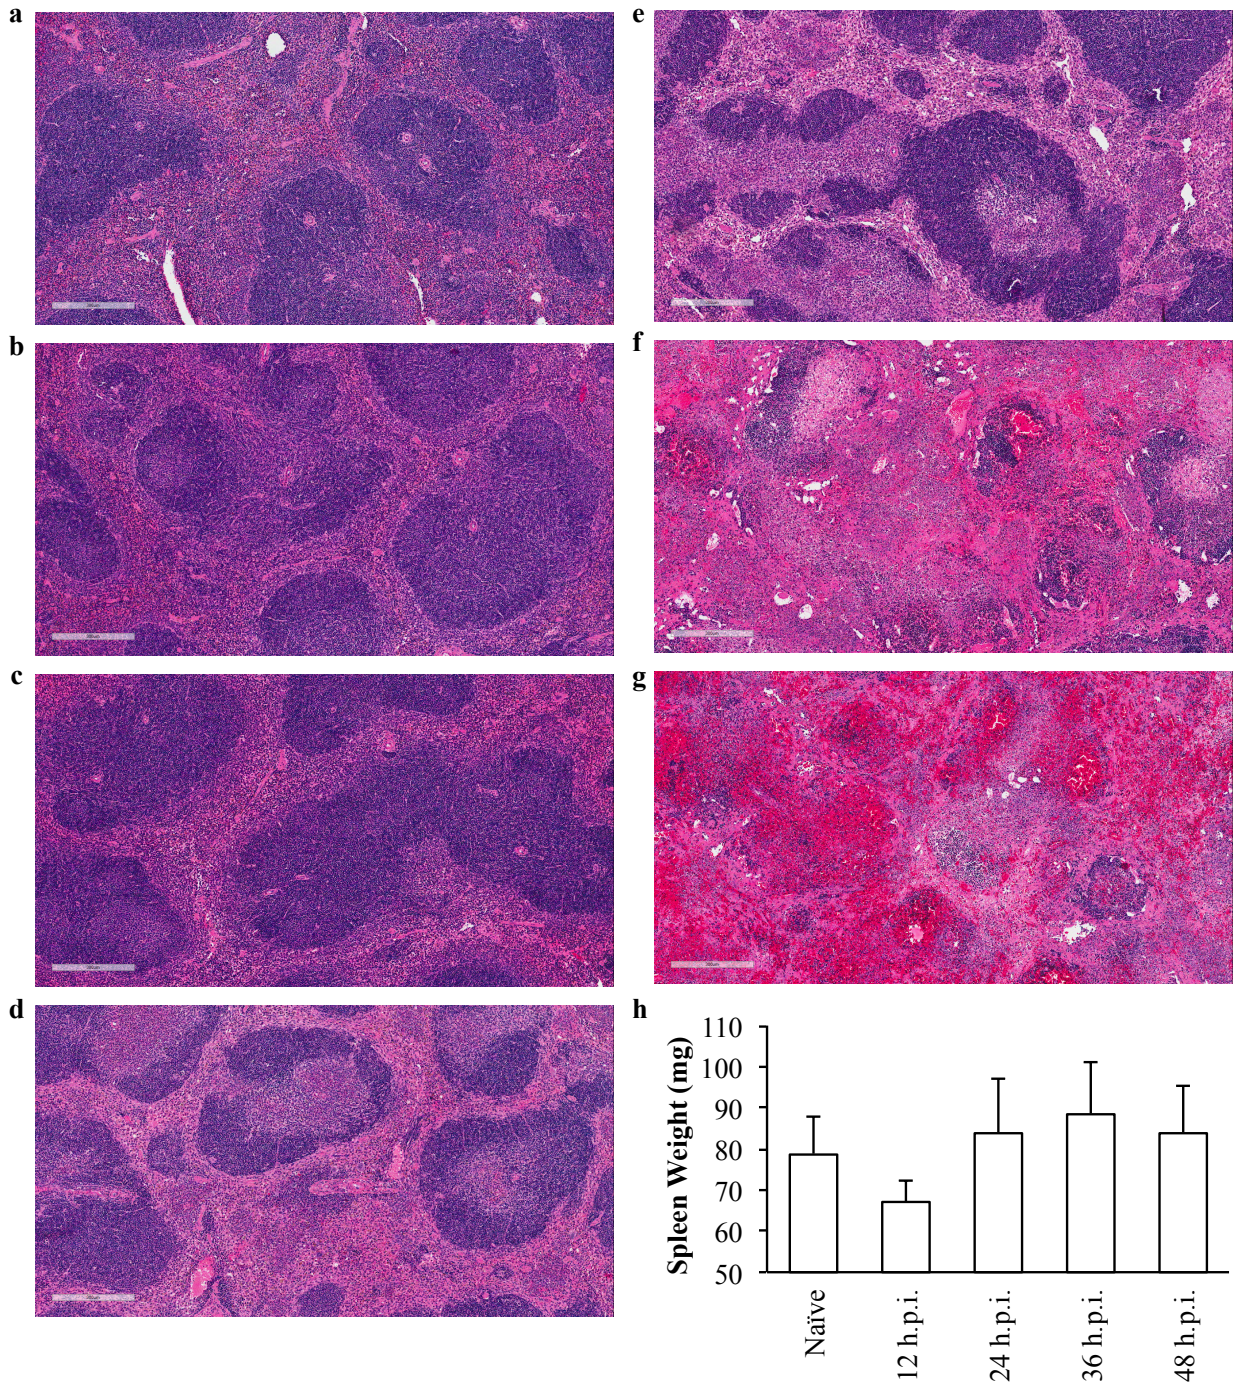

234  
 235  
 236  
 237  
 238  
 239  
 240  
 241  
 242

**Figure S7: Histological evaluation of progressive tissue destruction in *Fn*-infected spleens.** a-g) H&E stained FFPE spleen tissue excised from a lethal *Fn* timecourse infection. a) mock infected, b) 12 h.p.i., c) 24 h.p.i., d) 36 h.p.i., e) 48 h.p.i., f) 60 h.p.i., g) 72 h.p.i., representative of two replicate spleens at each timepoint. Scale bar: 300  $\mu$ m. h) Total spleen weights over timecourse, n=10.

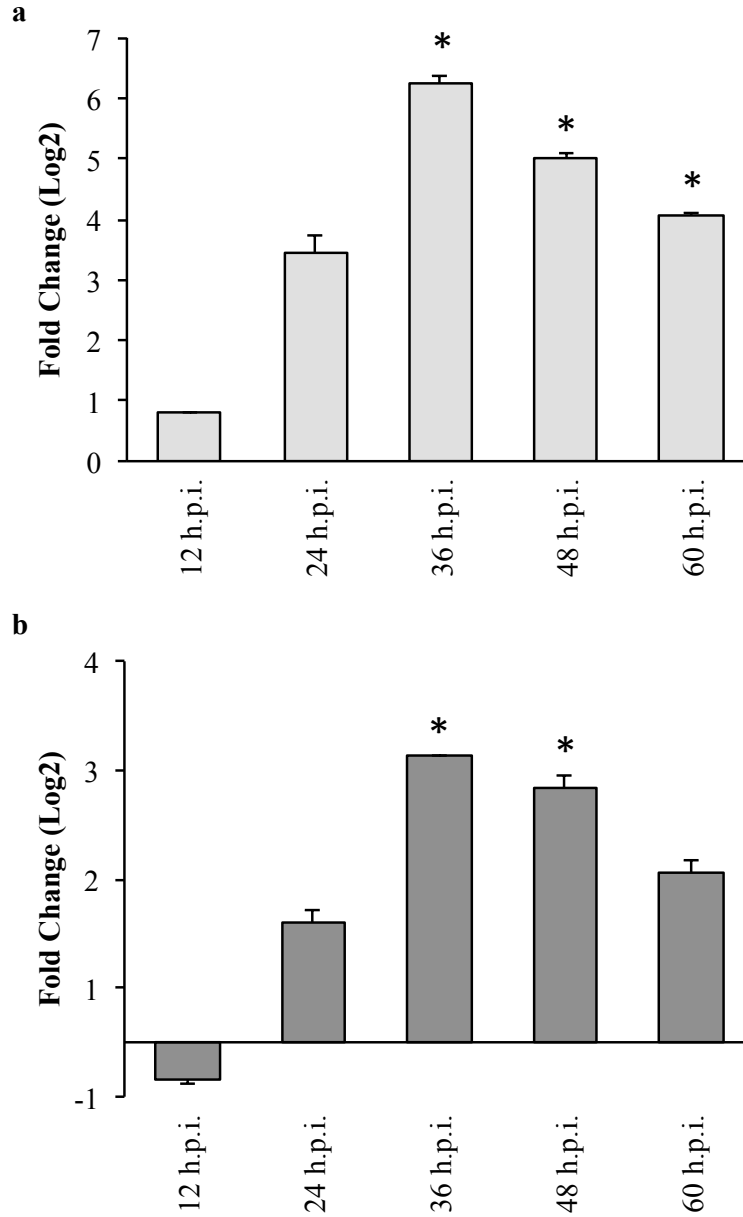

243  
 244  
 245  
 246  
 247  
 248  
 249

**Figure S8: Confirmation of early phase inflammatory markers following *Fn* infection in mouse spleen.** a-b) qRT-PCR of IL-1 $\beta$  and TNF- $\alpha$ , respectively, confirming activation of an innate immune reaction. Note, onset of fulminant infection coincides with peak production of IL-1 $\beta$ . Error bars = SD. n=3 per timepoint, \*  $p < 0.005$  using student's T-test of  $\Delta$ CT values.



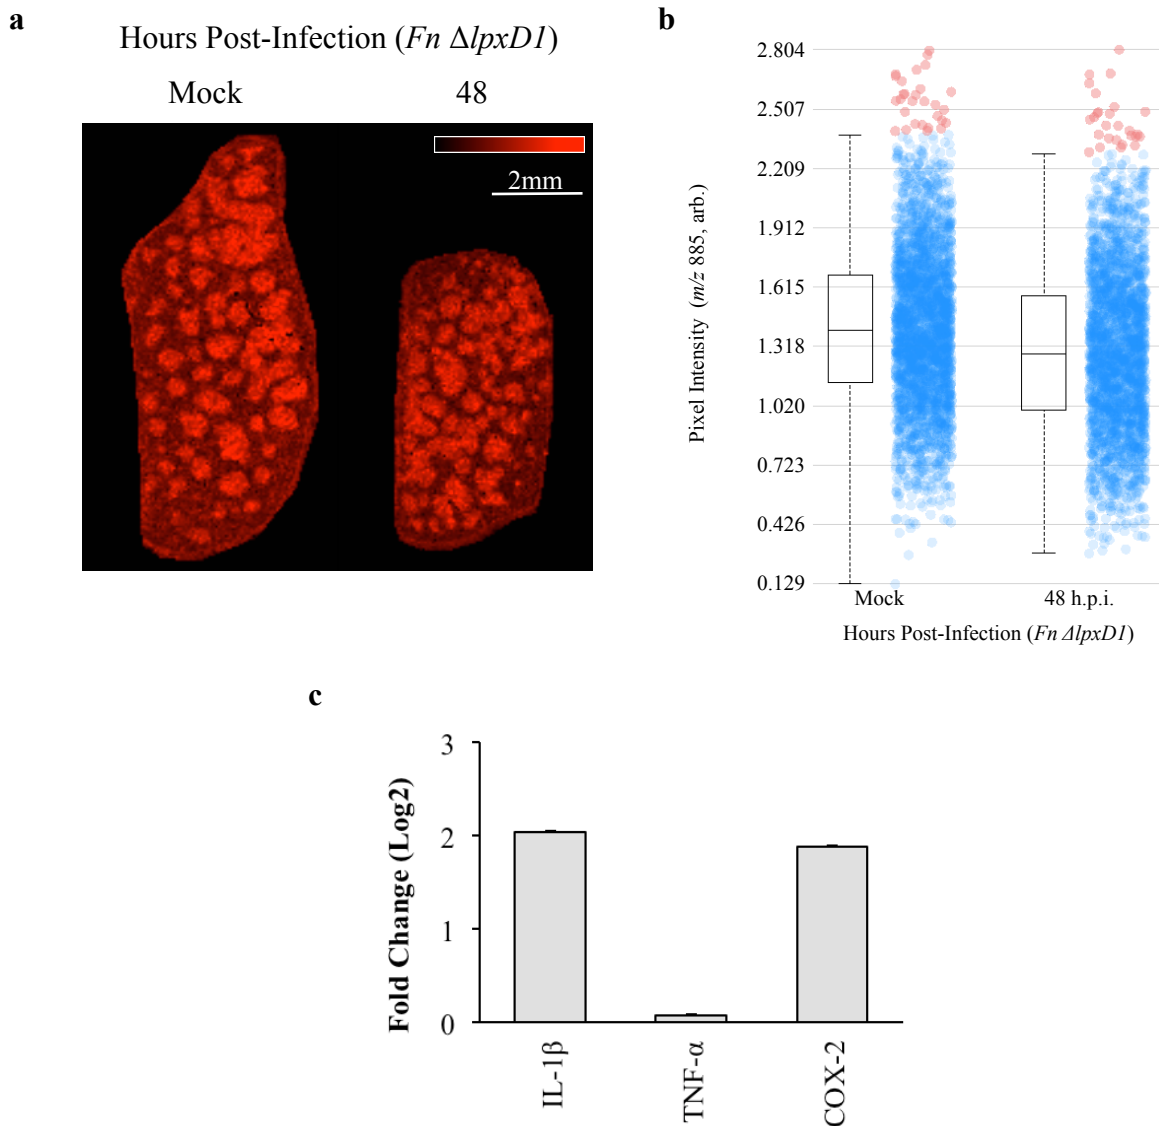

251

252

253 **Figure S9: SAPI is not depleted in spleens infected with an avirulent mutant of *Francisella*.**254 a) Negative ion mode image of *m/z* 885(SAPI), as in Fig. 2a, is shown in naïve and infected (*Fn*255  $\Delta$ *lpxD1*, 10<sup>6</sup> CFU, SQ) mouse spleens (13 $\mu$ m thickness), 75 $\mu$ m rastering, normalized to TIC,

256 data representative of 3 independent biological replicates. b) Pixel intensity plot describing data

257 in a). Box and whisker plots given to the left representing a summation of the individual pixel

258 intensities plotted on the right. c) qRT-PCR quantitation of innate markers IL-1 $\beta$  and TNF- $\alpha$ 259 alongside COX-2 48 h.p.i. (*Fn*  $\Delta$ *lpxD1*) versus mock infected spleens, n=4. Normalized to260 mouse *Hprt*.

261

262

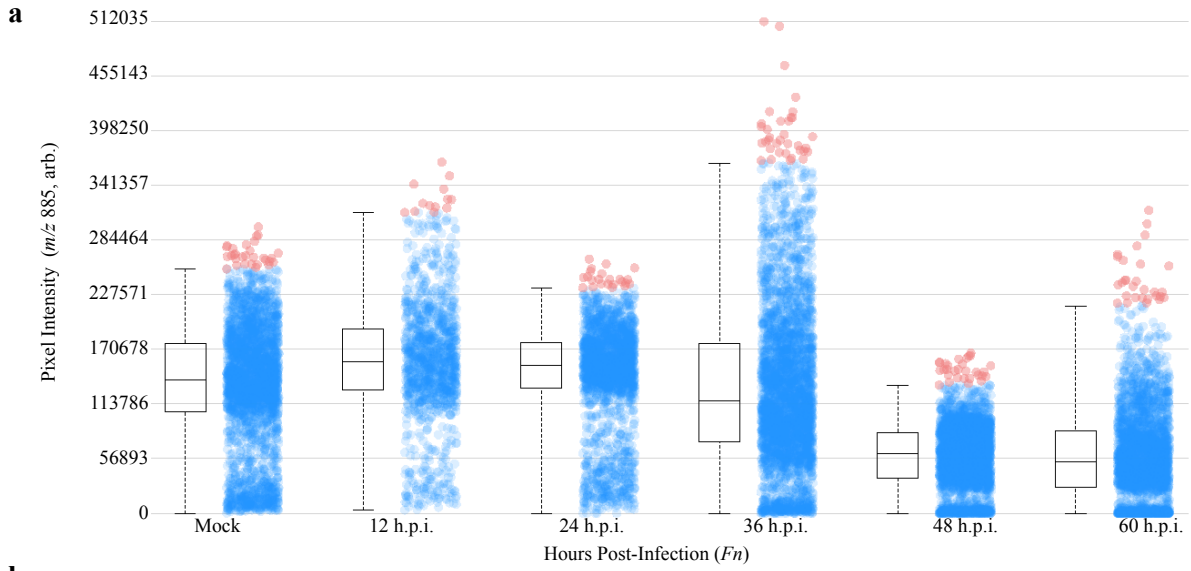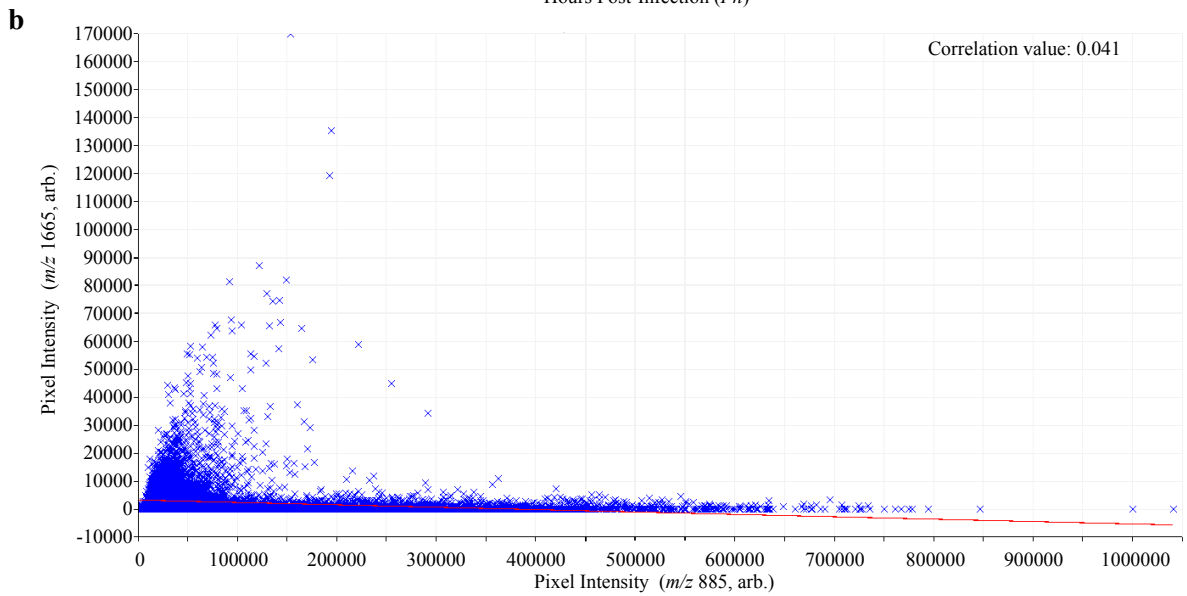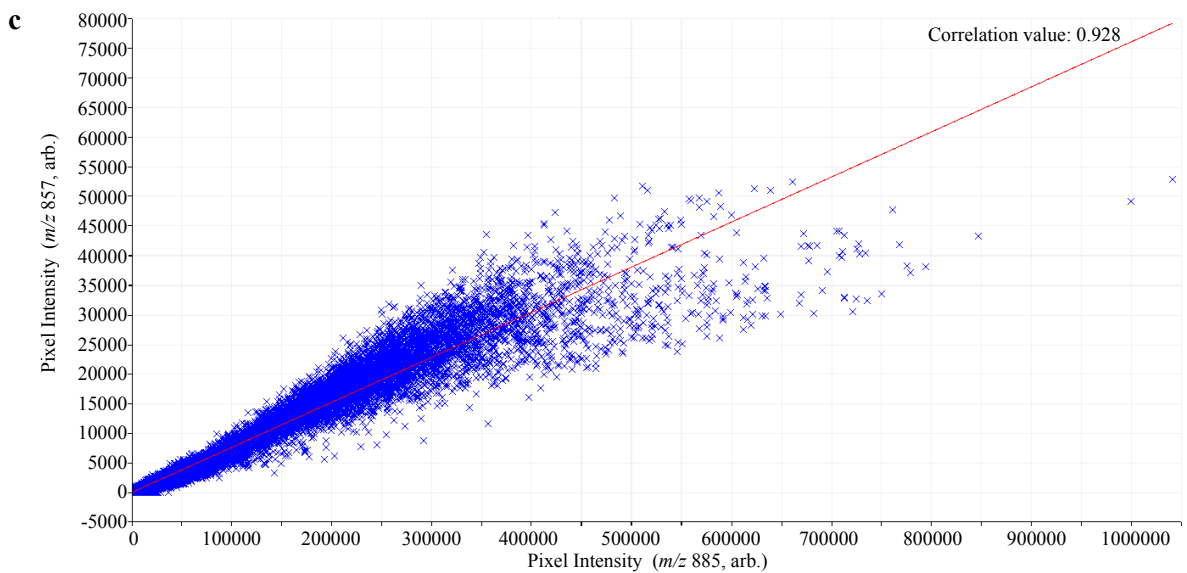

264 **Figure S10: Pixel intensities of SAPI across infection timecourse and correlation plots of**  
265 **lipid A:SAPI and SAPI:PI 36:4.** a) Pixel intensity (arbitrary units, normalized, TIC) plotted for  
266 each timecourse condition from MALDI-FTICR validation studies of MALDI-TOF imaging data  
267 in Fig. 2a. Box and whisker plots given to the left representing a summation of the individual  
268 pixel intensities plotted on the right. b) Pixel intensity correlation plot of SAPI versus lipid A for  
269 all pixels across entire timecourse, lipid A and SAPI have a correlation value of 0.041, no  
270 relationship. c) Pixel intensity correlation plot of two AA-bearing PI lipids: SAPI and PI 36:4 for  
271 all pixels across entire timecourse, SAPI and PI 36:4 have a correlation value of 0.982.  
272  
273

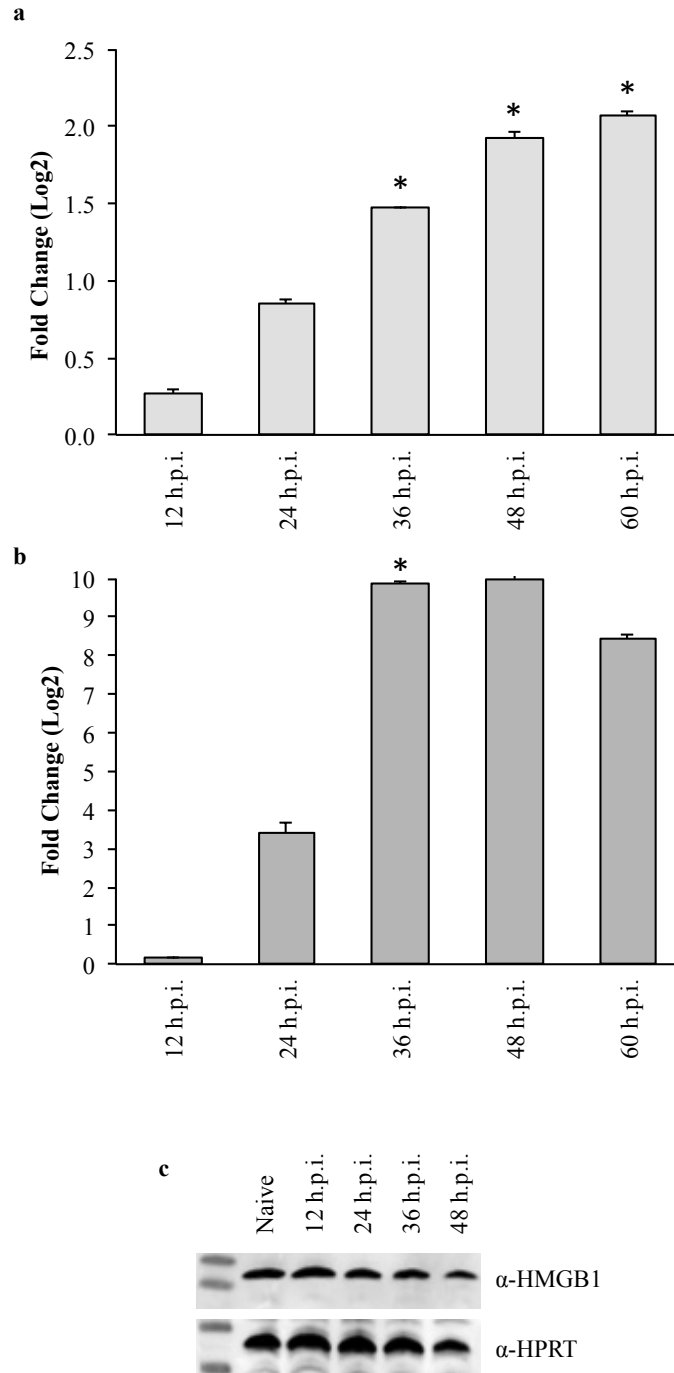

274  
 275  
 276  
 277  
 278  
 279  
 280  
 281  
 282

**Figure S11: Transcriptional upregulation of genes involved in lipid mediated inflammation during *Fn* infection.** a) qRT-PCR of *cPla2* gene (mouse *Hprt* control) across timecourse. b) qRT-PCR of *Ptgs2* gene (encoding COX-2; mouse *Hprt* control). Fold change expression and standard deviation. (n=3 per timepoint, \*  $p < 0.005$  using student's T-test of  $\Delta$ CT values. c) Western blot detection of splenic HMGB1, loading control HPRT. Total protein isolated from spleens across the twelve-hour timecourse, representative of results from two animals per group.

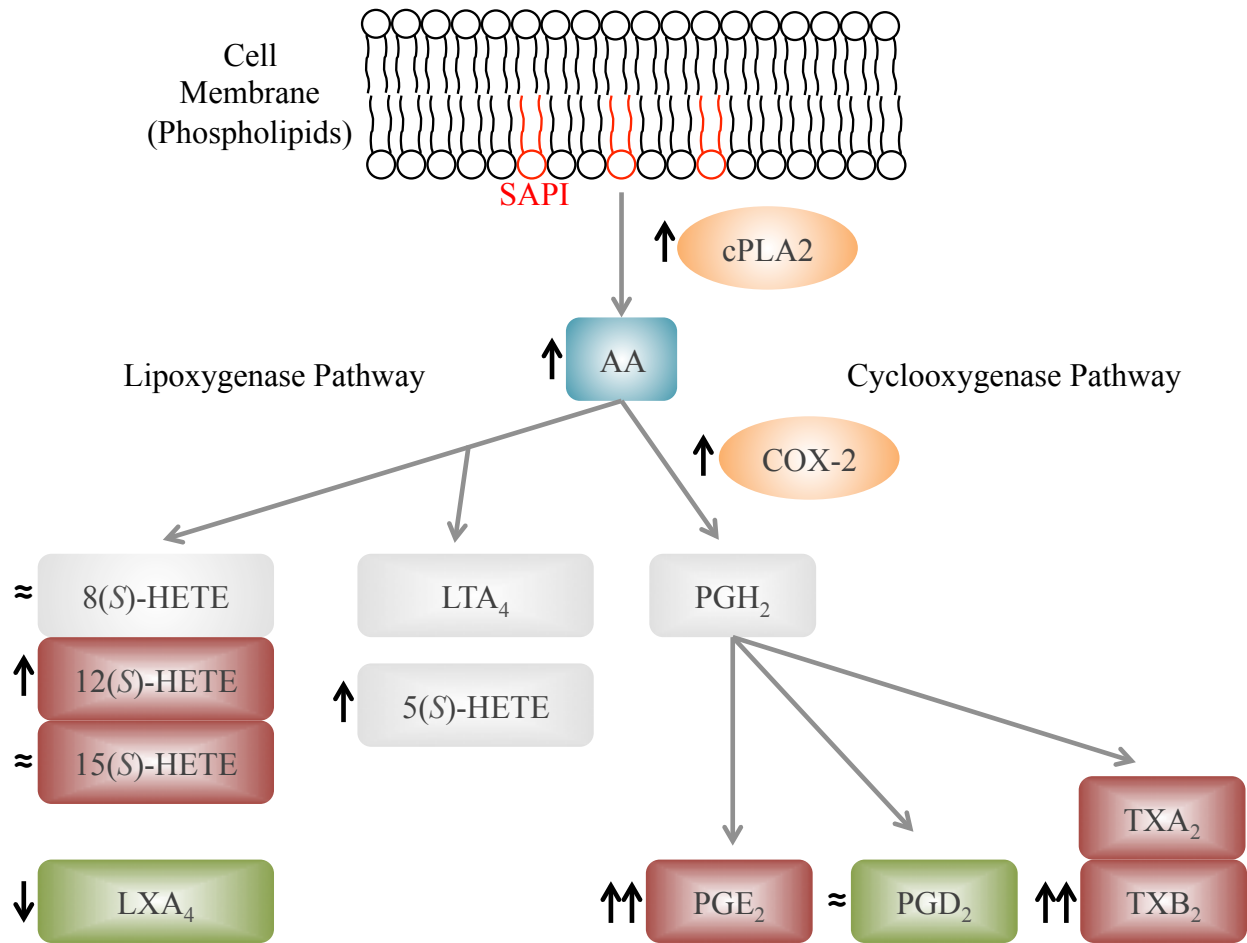

283  
284  
285  
286  
287  
288  
289  
290  
291  
292  
293  
294  
295  
296

**Figure S12: Regulatory schema of lipoxigenase (LOX) and cyclooxygenase (COX) pathways at 48 h.p.i. (*Fn*).** Both cPLA2 and COX-2 (orange) are induced at 48 h.p.i. (data from **Fig. S11a-b**). AA is released from the membrane – from phospholipids such as SAPI and other AA-bearing lipids (data from **Figs. 2a-b, 3a**). Metabolic products of COX and LOX are given at up- or down-regulated (arrow direction), as interpreted from LCMS data (PGE<sub>2</sub> and PGD<sub>2</sub> shown in **Fig. 3b-c**, remainder not shown). Single arrow = <5-fold change versus mock infected spleens; double arrows = >20-fold change versus mock-infected spleens. n=10. AA-derived products: red: upregulated; green, downregulated or no change; grey not tested.

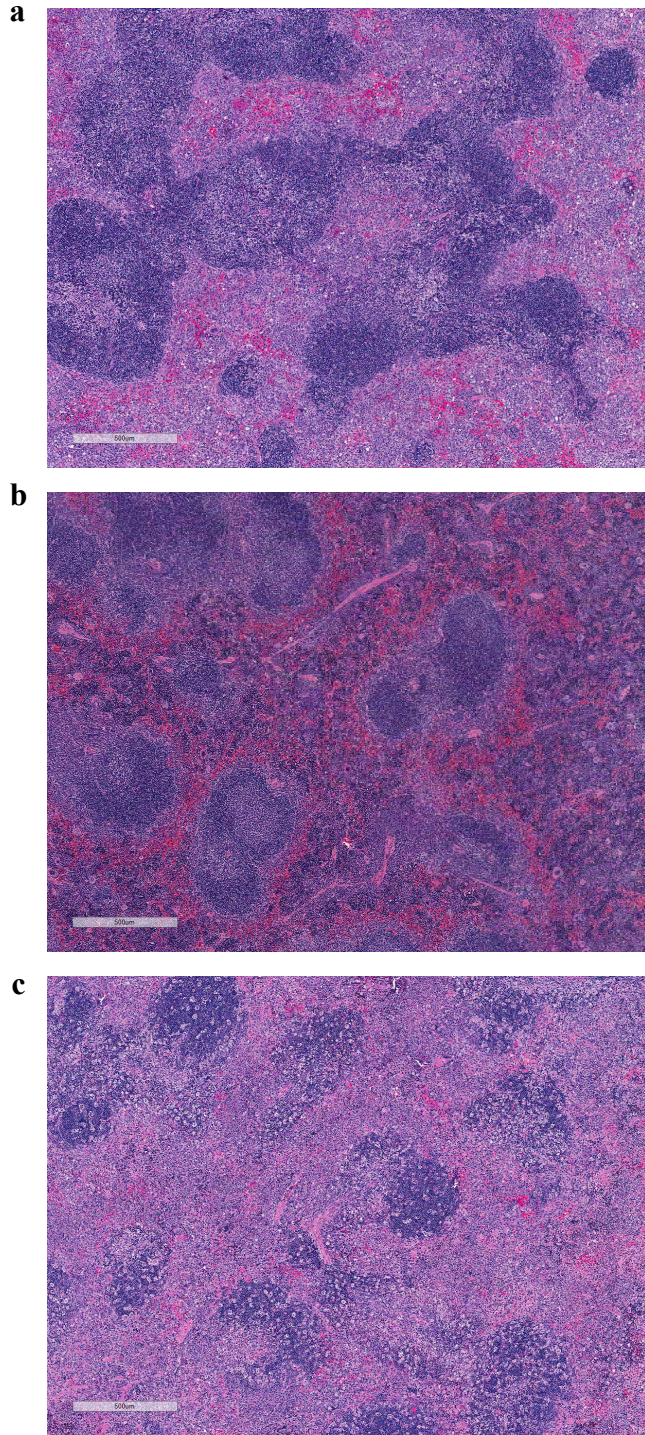

297  
298  
299  
300  
301  
302  
303

**Figure S13: *Fn*-induced tissue pathology in COX-2 KO mice is less severe than in wildtype mice at the lethal timepoint (72 h.p.i.) for wildtype mice.** a-c) Triplicate spleens from COX-2 KO mice infected with *Fn*, 72 h.p.i., H&E of FFPE tissue. Scale bar: 500 μm.



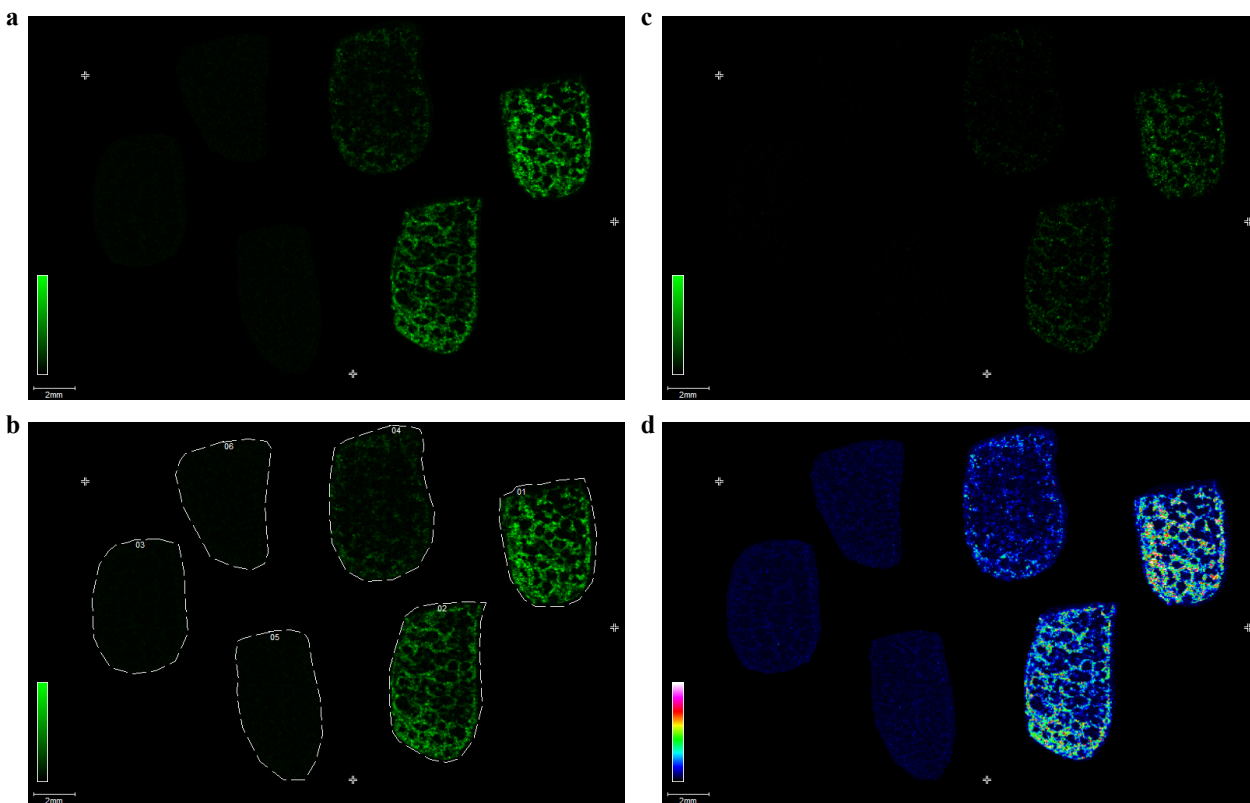

304  
 305  
 306  
 307  
 308  
 309  
 310  
 311  
 312  
 313

**Figure S14: Data preparation for Figure 1a, MALDI-TOF.** a) Uncropped image used for **Fig. 1a**, normalized to TIC, unmodified for printing. For printing purposes the images in **Fig. 1a** had 10% contrast applied universally to match the contrast observed on-screen. b) Data from a) with collection regions outlined in white. c) Raw data, unnormalized. d) Data from a) shown on a multicolor scale.

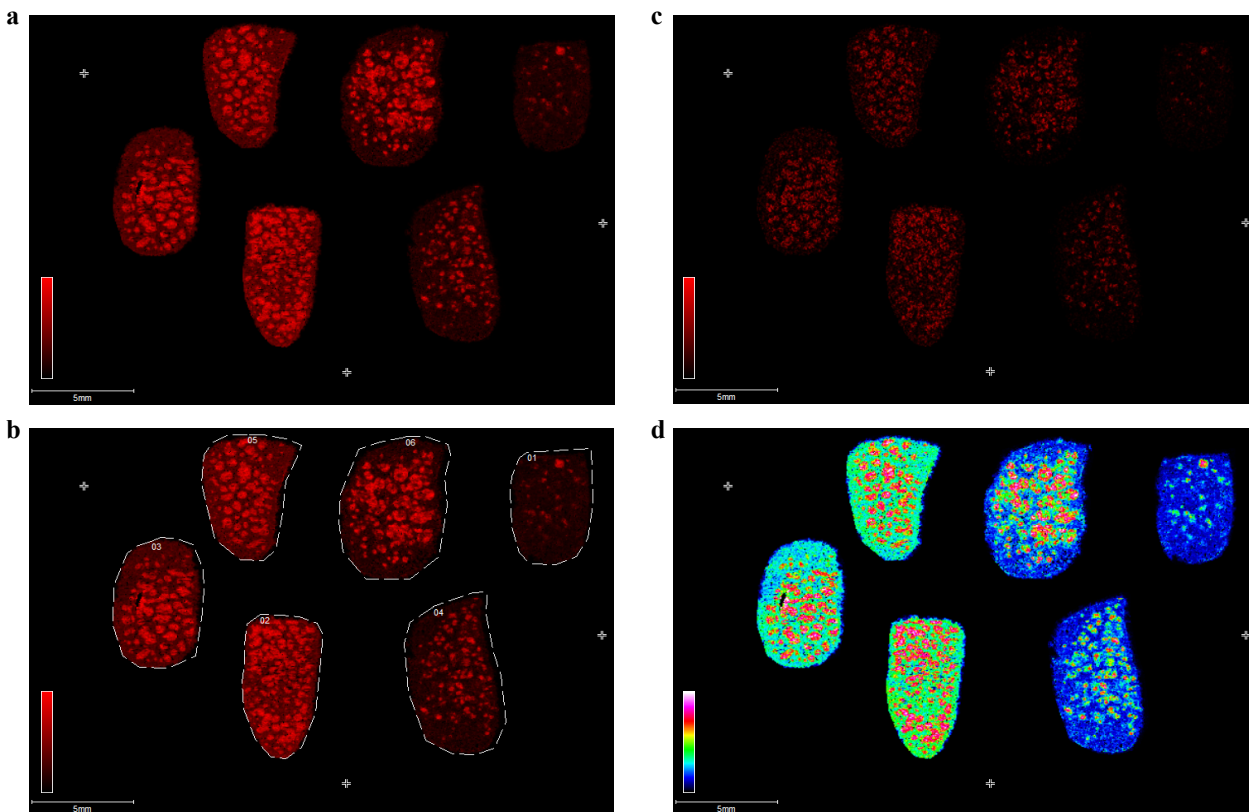

314  
 315  
 316  
 317  
 318  
 319  
 320  
 321  
 322  
 323

**Figure S15: Data preparation for Figure 2a, MALDI-TOF.** a) Uncropped image used for **Fig.2a**, normalized to TIC, unmodified for printing. For printing purposes the images in **Fig. 2a** had 10% contrast applied universally to match the contrast observed on-screen. b) Data from a) with collection regions outlined in white. c) Raw data, unnormalized. d) Data from a) shown on a multicolor scale.



324 **REFERENCES**

- 325
- 326 1. Li, Y. *et al.* LPS remodeling is an evolved survival strategy for bacteria. *Proc. Natl. Acad. Sci. U.S.A.* **109**, 8716–8721 (2012).
  - 327
  - 328 2. Li, Y., Wang, X. & Ernst, R. K. A rapid one-step method for the characterization of  
329 membrane lipid remodeling in *Francisella* using matrix-assisted laser desorption  
330 ionization time-of-flight tandem mass spectrometry. *Rapid Commun. Mass Spectrom.* **25**,  
331 2641–2648 (2011).
  - 332 3. Morham, S. G. *et al.* Prostaglandin synthase 2 gene disruption causes severe renal  
333 pathology in the mouse. *Cell* **83**, 473–482 (1995).
  - 334 4. Scott, A. J., Flinders, B. & Cappell, J. Norharmane Matrix Enhances Detection of  
335 Endotoxin by MALDI-MS for Simultaneous Profiling of Pathogen, Host, and Vector  
336 Systems. *Pathogens and Disease* (2016).
  - 337 5. Scott, A. J. *et al.* Mass spectrometry imaging enriches biomarker discovery approaches  
338 with candidate mapping. *Health Phys* **106**, 120–128 (2014).
  - 339 6. Ogrinc Potočnik, N., Porta, T., Becker, M., Heeren, R. M. A. & Ellis, S. R. Use of  
340 advantageous, volatile matrices enabled by next-generation high-speed matrix-assisted  
341 laser desorption/ionization time-of-flight imaging employing a scanning laser beam. *Rapid*  
342 *Commun. Mass Spectrom.* **29**, 2195–2203 (2015).
  - 343 7. Trede, D. *et al.* Exploring Three-Dimensional Matrix-Assisted Laser  
344 Desorption/Ionization Imaging Mass Spectrometry Data: Three-Dimensional Spatial  
345 Segmentation of Mouse Kidney. *Anal. Chem.* **84**, 6079–6087 (2012).
  - 346 8. Lerner, R., Post, J., Loch, S., Lutz, B., Bindila, L. Targeting brain and peripheral plasticity  
347 of the lipidome in acute kainic acid-induced epileptic seizures in mice via quantitative  
348 mass spectrometry. *Biochim. Biophys. Acta.* **1862**, 255–267 (2017).
  - 349 9. Fahy, E., Sud, M., Cotter, D. & Subramaniam, S. LIPID MAPS online tools for lipid  
350 research. *Nucleic Acids Research* **35**, W606–W612 (2007).
  - 351 10. Cole, L. E. *et al.* Macrophage proinflammatory response to *Francisella tularensis* live  
352 vaccine strain requires coordination of multiple signaling pathways. *Journal of*  
353 *Immunology* **180**, 6885–6891 (2008).
  - 354 11. Shaffer, S. A., Harvey, M. D., Goodlett, D. R. & Ernst, R. K. Structural heterogeneity and  
355 environmentally regulated remodeling of *Francisella tularensis* subspecies *novicida* lipid  
356 A characterized by tandem mass spectrometry. *J. Am. Soc. Mass Spectrom.* **18**, 1080–1092  
357 (2007).
  - 358
